# Supplementary material for: (−)-Kunstleramide, a New Antioxidant and Cytotoxic Dienamide from the Bark of Beilschmiedia kunstleri Gamble
Source: PubMed Central journal article supplement (PMC6268565; doi:10.3390/molecules17044197), 2012-04-05

Supplementary Material

Figure 1S. IR spectrum of (-)-kunstleramide (1).

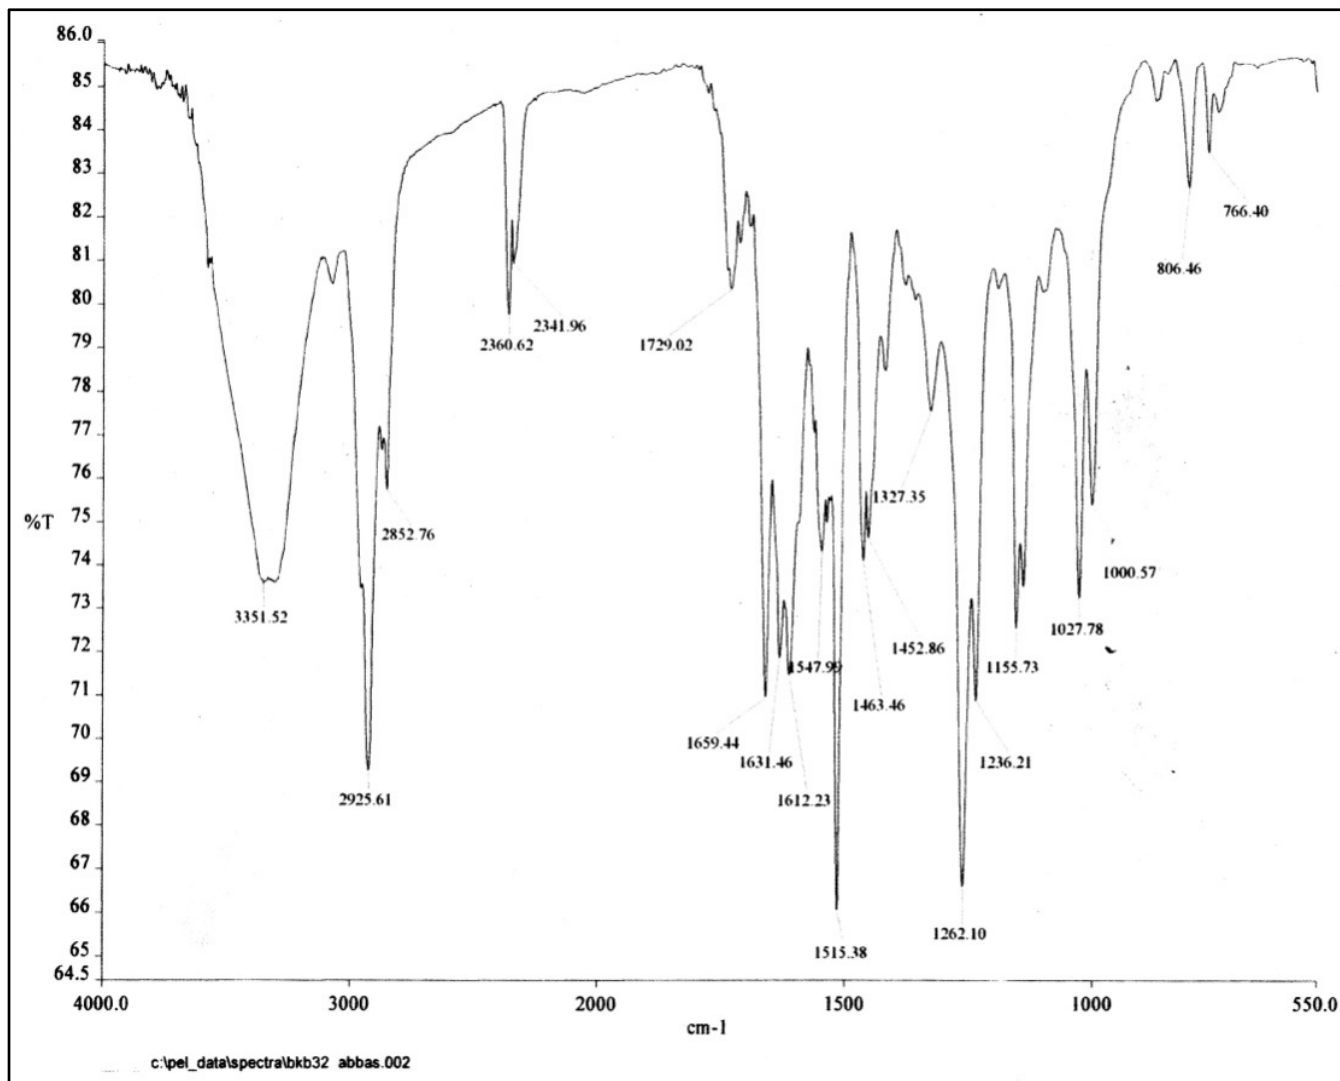

**Figure 2S.** CD spectrum of (-)-*kunstleramide* (1).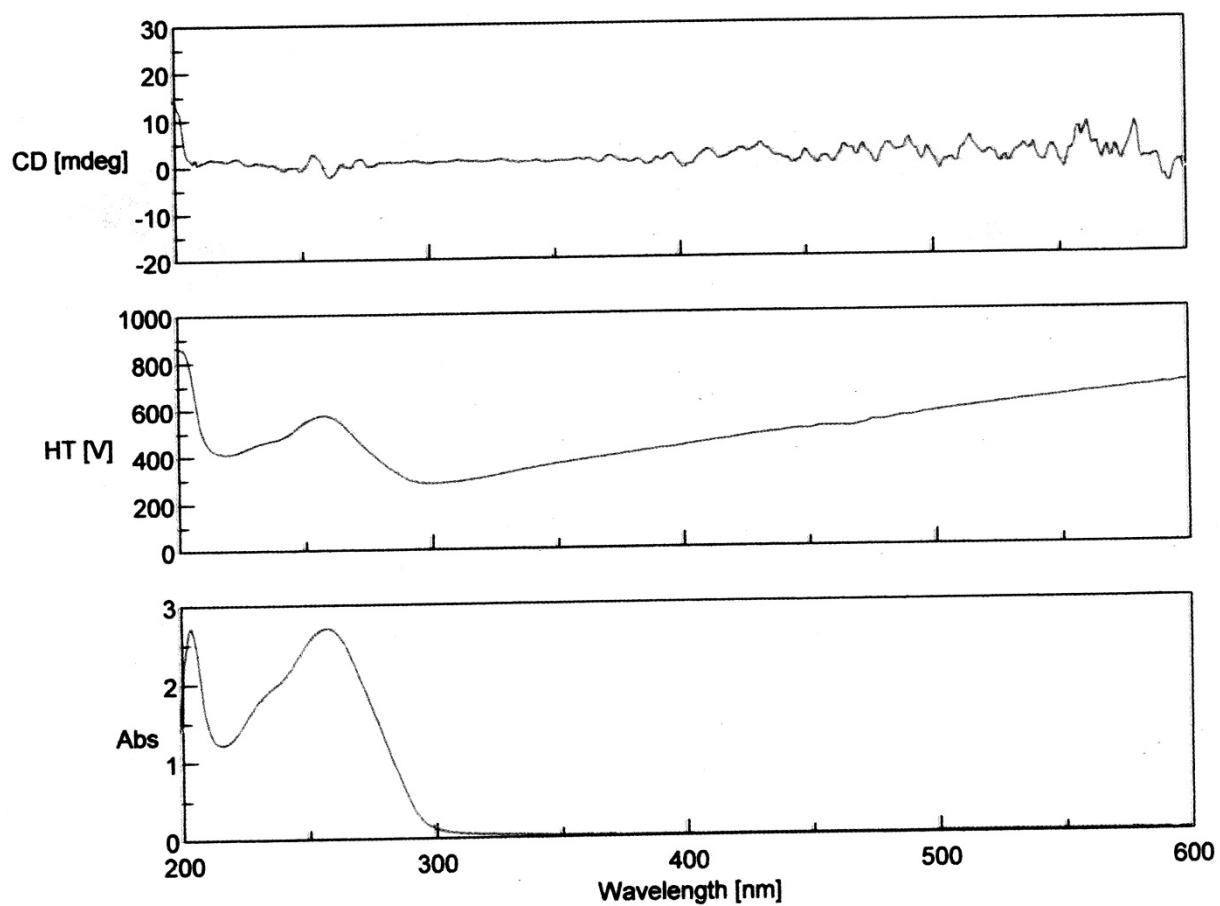

Figure 3S. MS of (-)-kunstleramide (1).

|               |          |             |        |                 |              |                        |                       |
|---------------|----------|-------------|--------|-----------------|--------------|------------------------|-----------------------|
| Sample Name   | Fe(2)    | Position    | Vial 2 | Instrument Name | Instrument 1 | User Name              |                       |
| Inj Vol       | -1       | InjPosition |        | SampleType      | Sample       | IRM Calibration Status | All Ions Missed       |
| Data Filename | LC4003.d | ACQ Method  | ms.m   | Comment         |              | Acquired Time          | 2/16/2011 10:16:04 AM |

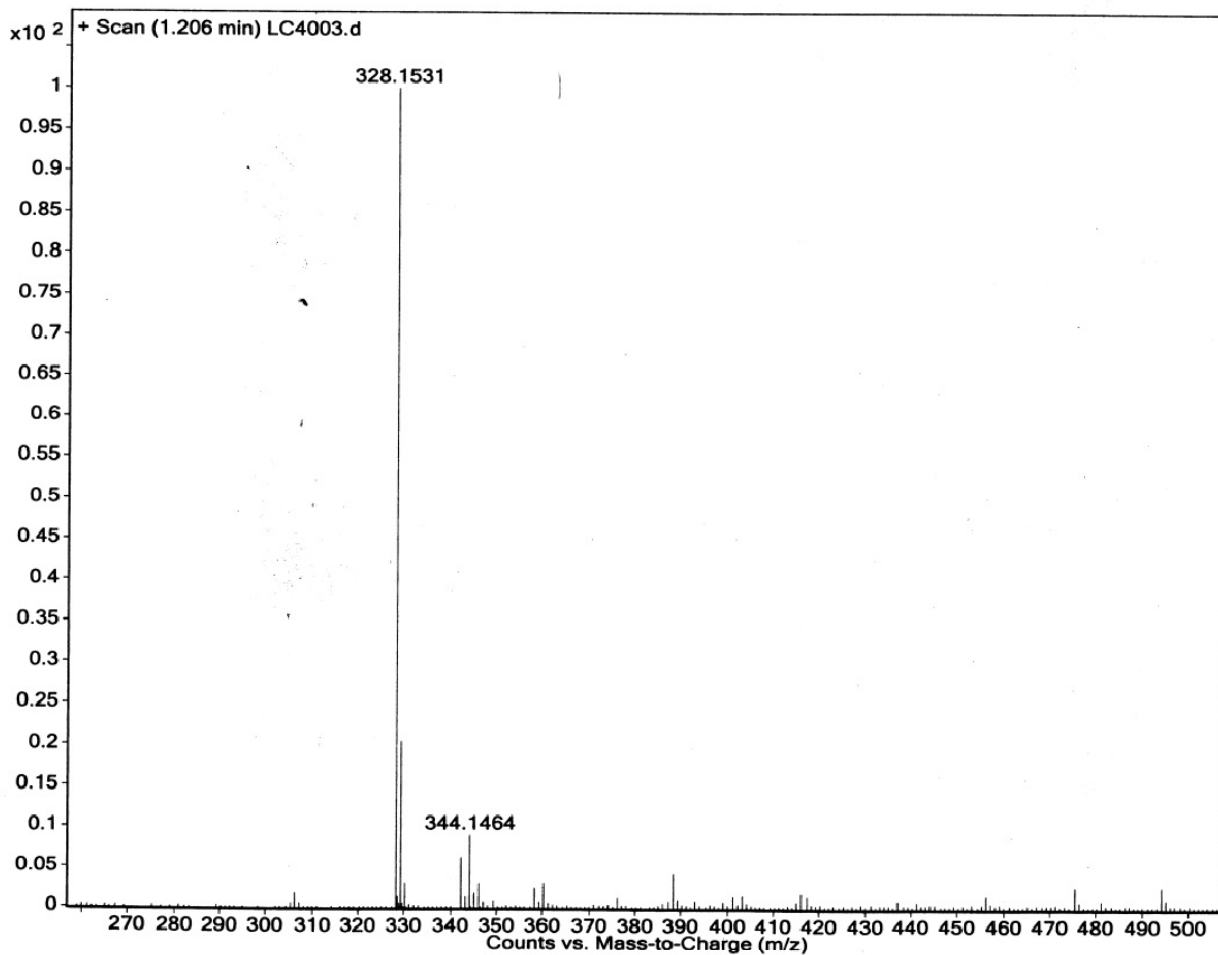

Figure 4S.  $^1\text{H}$ -NMR spectrum of (-)-*kunstleramide* (1).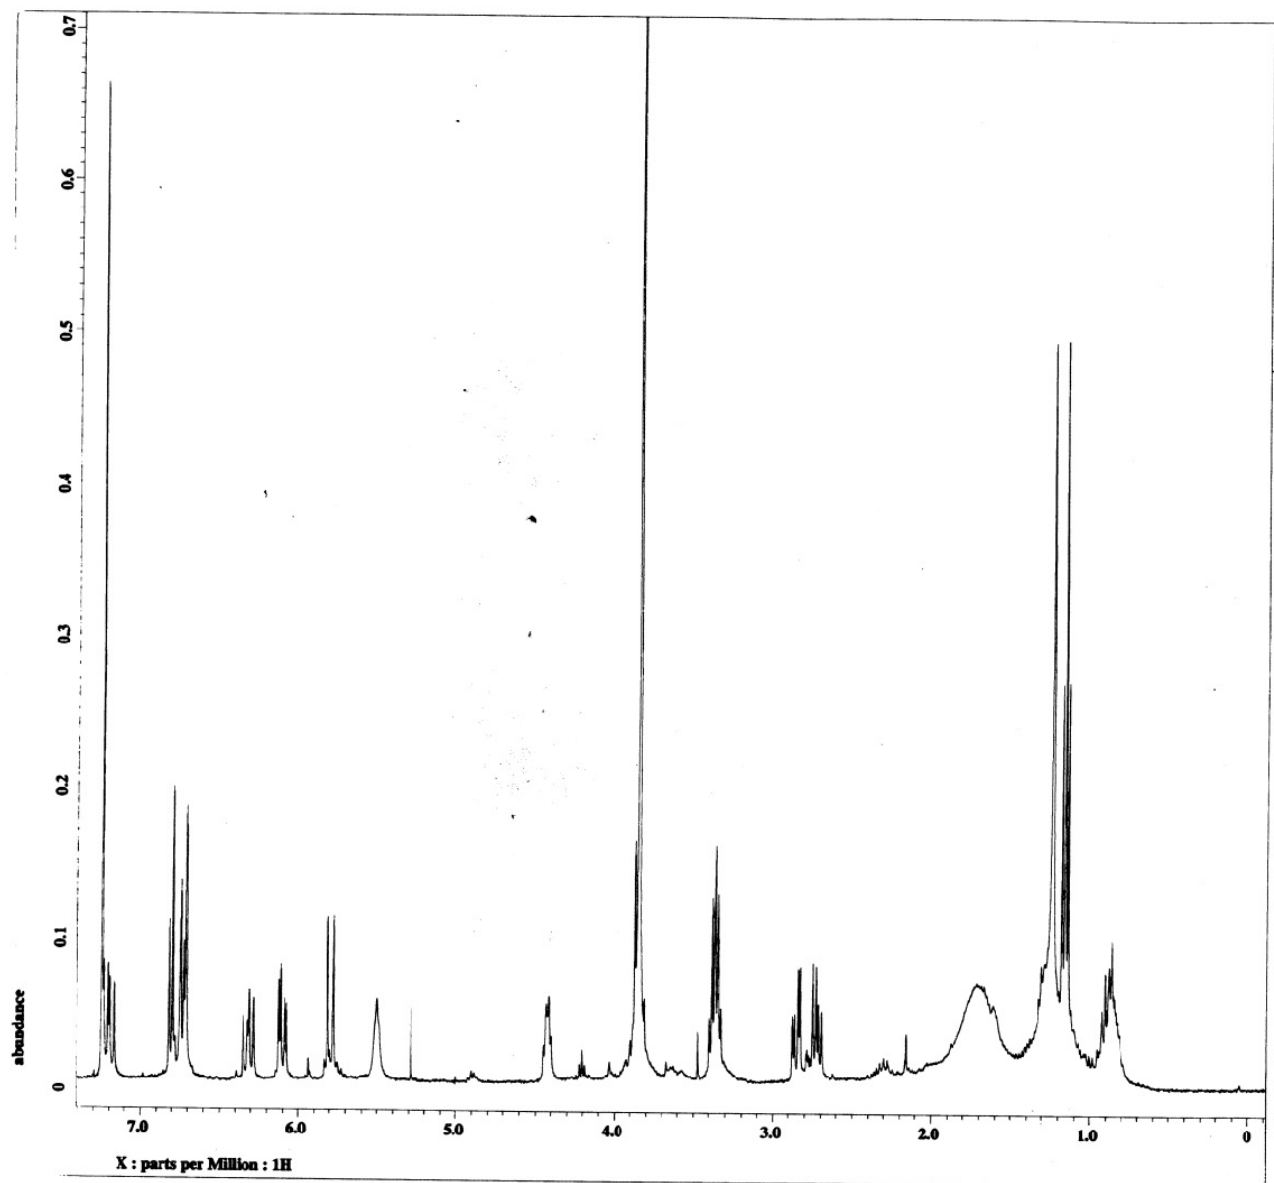

Figure 5S.  $^{13}\text{C}$ -NMR spectrum of (-)-*kunstleramide* (1).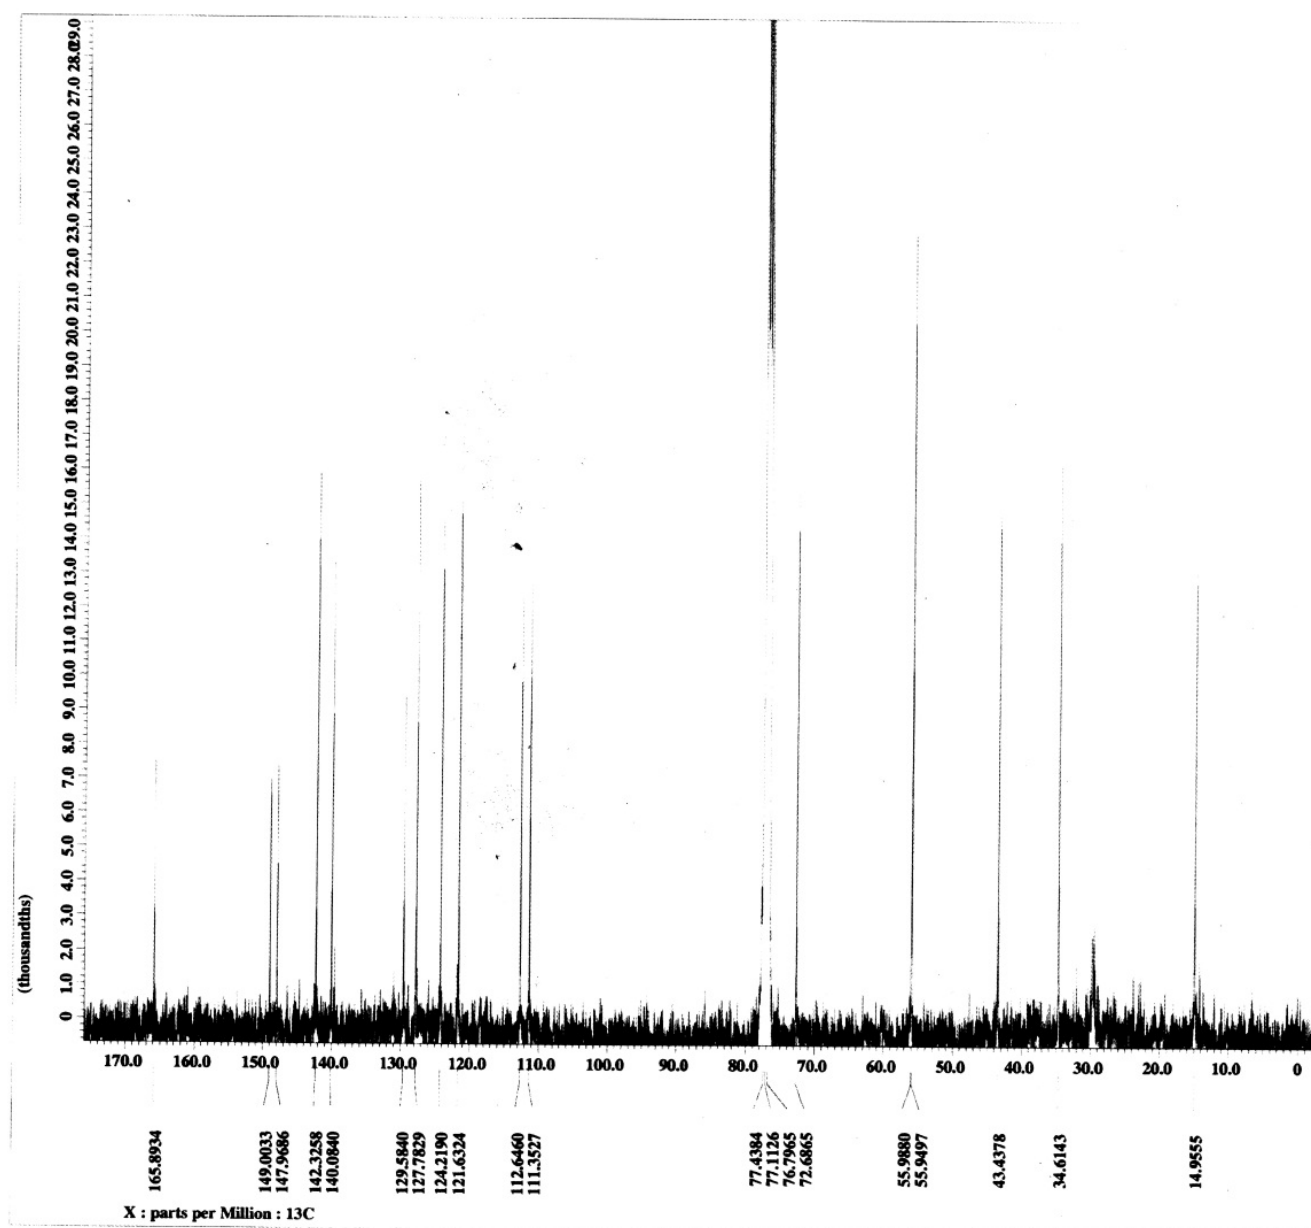

Figure 6S. DEPT of (-)-kunstleramide (1).

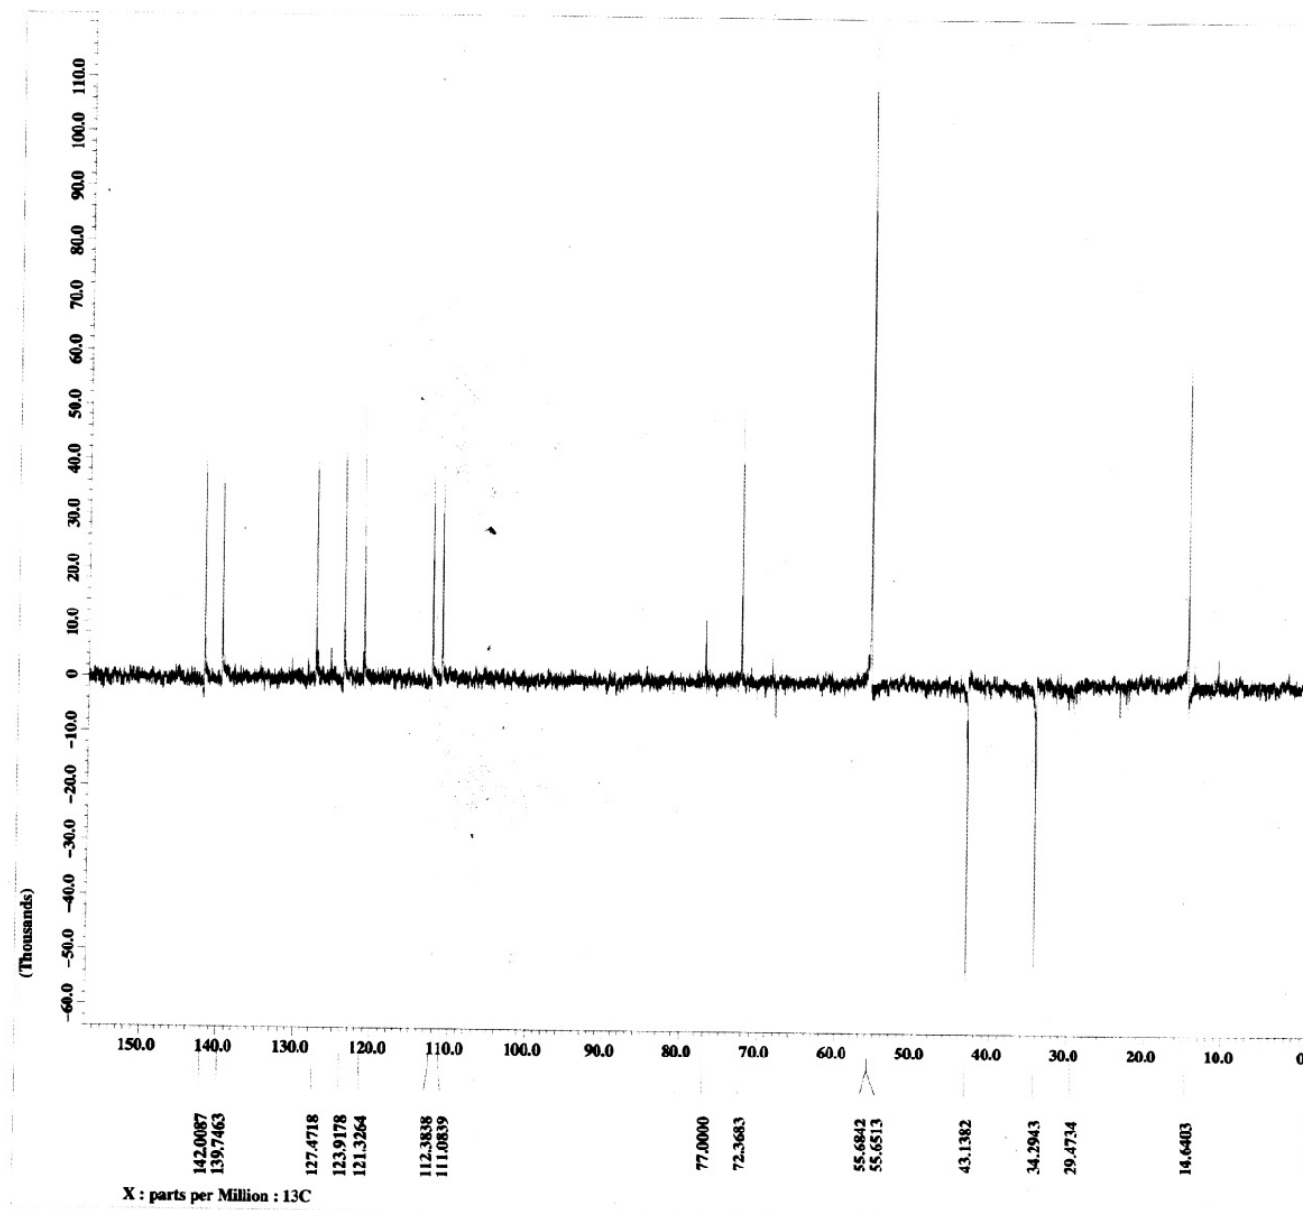

Figure 7S. COSY spectrum of (-)-kustleramide (1).

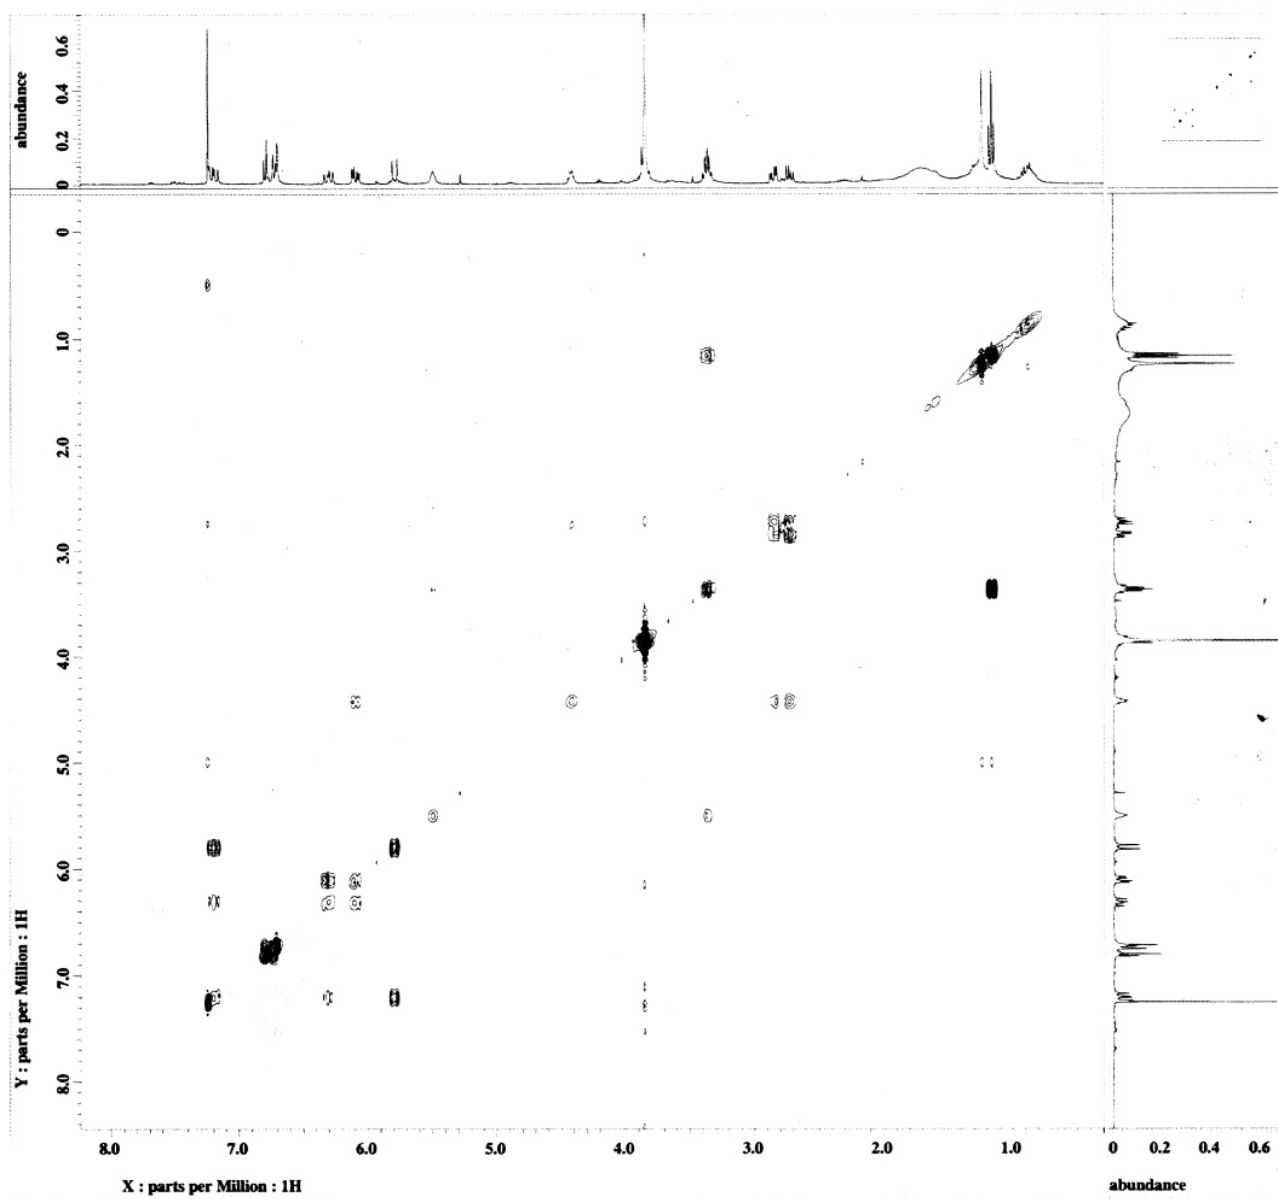

Figure 8S. NOESY spectrum of (-)-kustleramide (1).

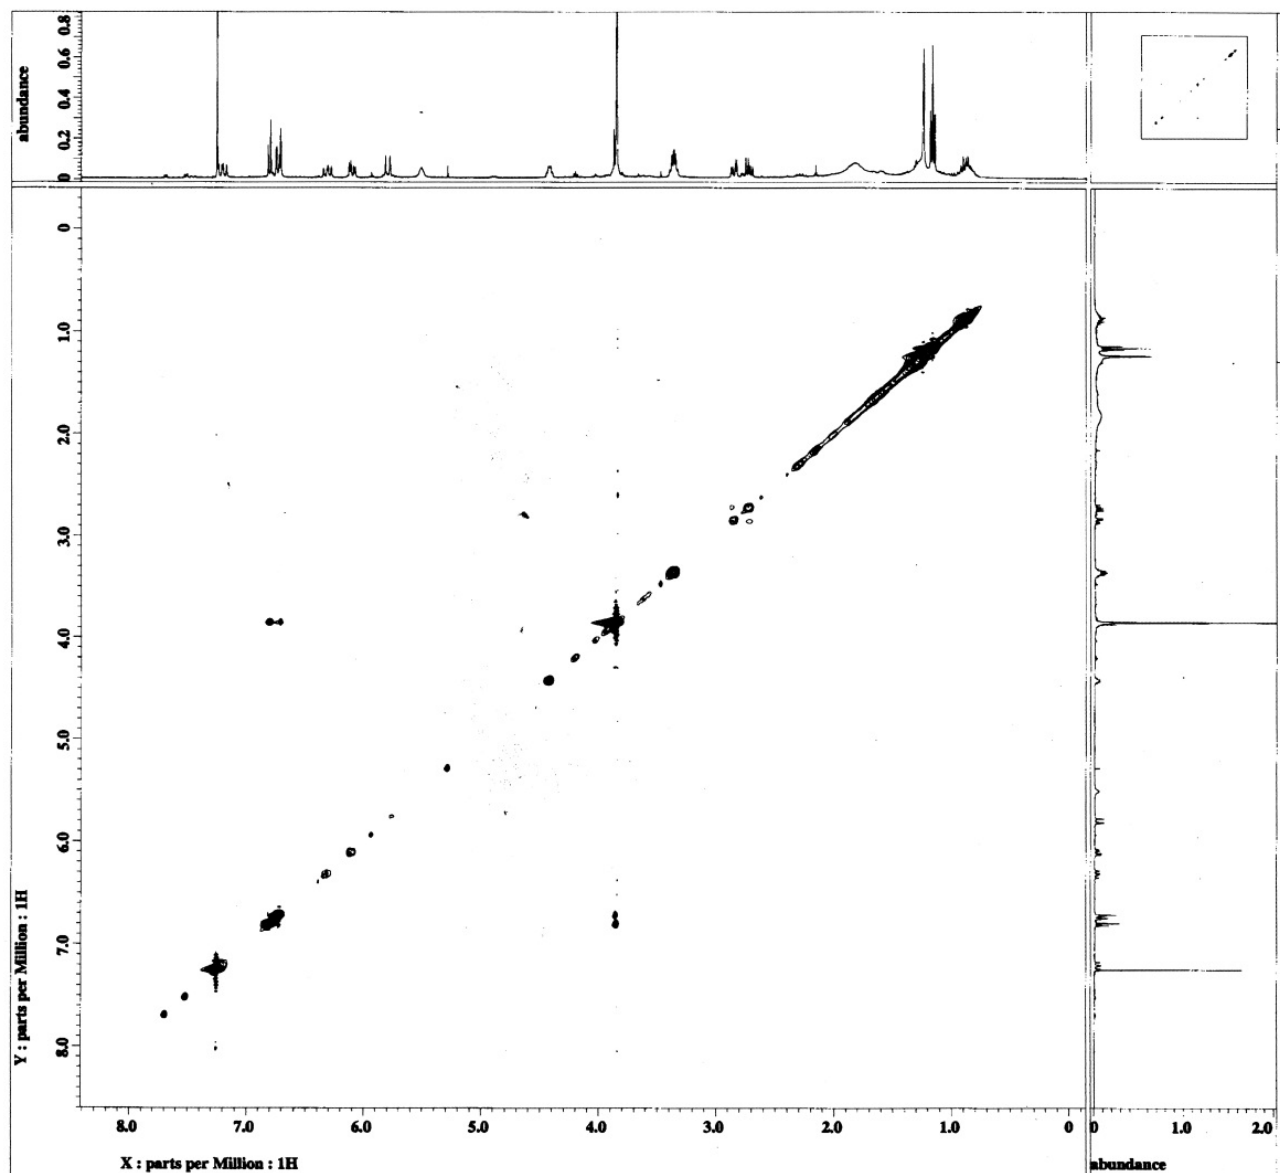



Figure 9S. HMQC spectrum of (-)-kunstleramide (1).

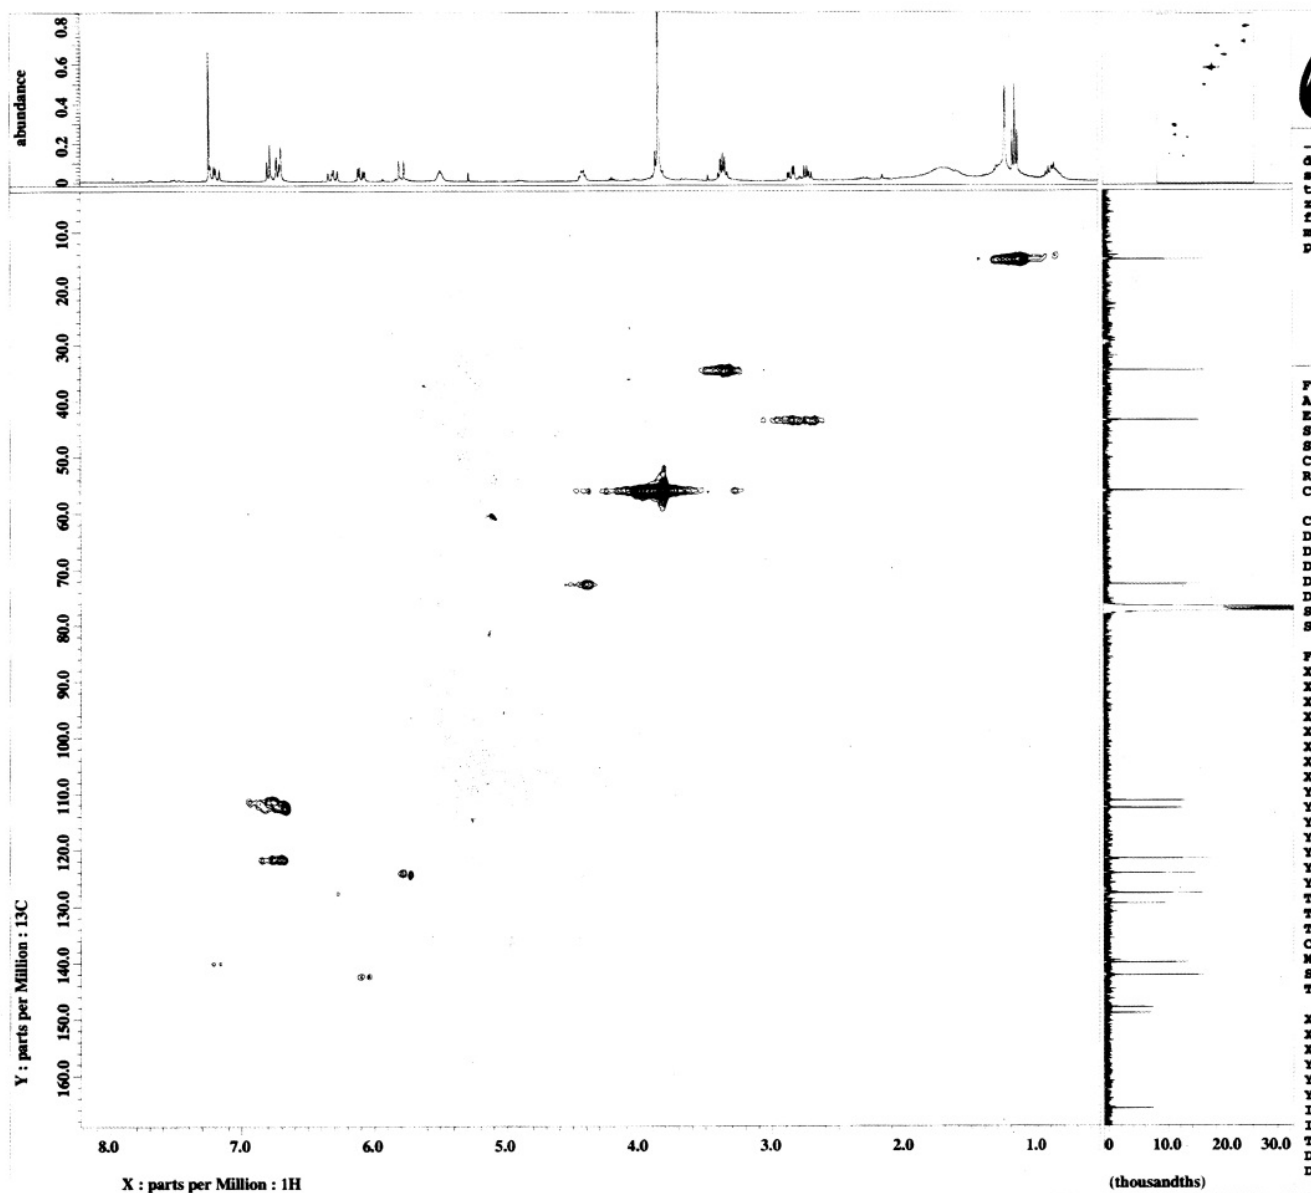

Figure 10S. HMBC spectrum of (-)-kunstleramide (1).

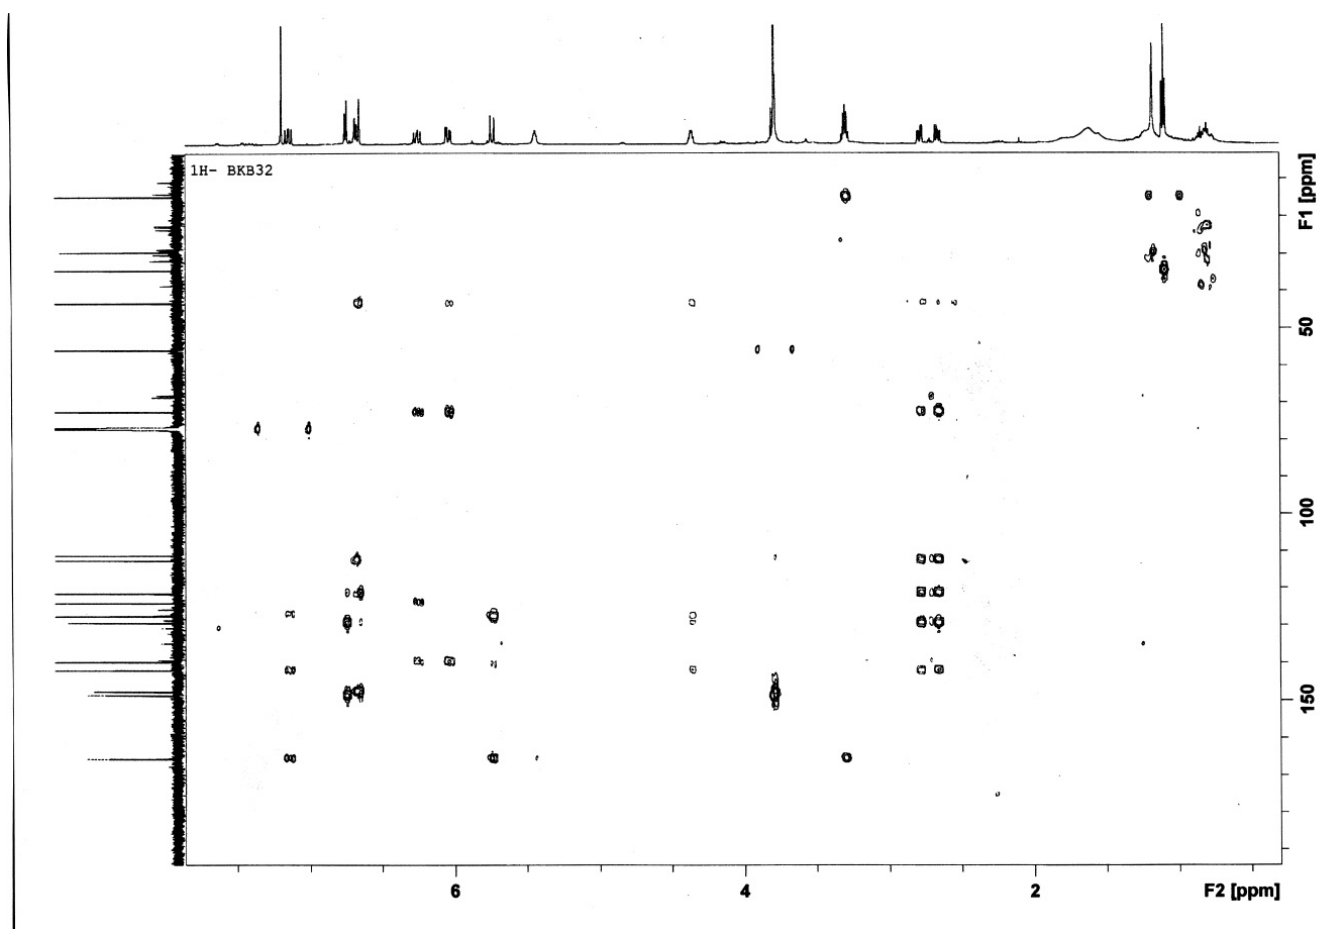

Supplement: molecules-17-04197-s001.pdf [file molecules-17-04197-s001.pdf]
